# Supplementary material for: Prognostic Value and Predication Model of Microvascular Invasion in Patients with Intrahepatic Cholangiocarcinoma
Source: PubMed Central journal article supplement (PMC6775679; doi:10.7150/jca.32199), 2019-09-07
Supplement: jcav10p5575s1.pdf [file jcav10p5575s1.pdf]

**Supplemental Table 1** Univariable Cox regression analyses of OS and DFS in ICC patients before and after propensity matched cohort.

| Characteristic | Variables | Before PSM               |         |                           |         | After PSM                |         |                           |         |
|----------------|-----------|--------------------------|---------|---------------------------|---------|--------------------------|---------|---------------------------|---------|
|                |           | Univariate analysis (OS) |         | Univariate analysis (DFS) |         | Univariate analysis (OS) |         | Univariate analysis (DFS) |         |
|                |           | HR(95% CI)               | P value | HR(95% CI)                | P value | HR(95% CI)               | P value | HR(95% CI)                | P value |
| MVI            | No vs Yes | 1.177(0.834-1.663)       | 0.354   | 1.670(1.223-2.281)        | 0.001   | 0.961(0.652-1.417)       | 0.842   | 1.715(1.204-2.442)        | 0.003   |

*Abbreviations: MVI, microvascular Invasion; OS, overall survival; DFS, disease-free survival; HR, hazard ratio; PSM, propensity score matching.*

*Method=Enter,  $\alpha=0.05$ .*

**Supplemental Table 2** Accuracy of the Prediction Score of the Nomogram for Estimating the Risk of MVI Presence.

| Variable                                   | Value (95% CI)      |                     |                     |
|--------------------------------------------|---------------------|---------------------|---------------------|
|                                            | Training Cohort     | Validation Cohort 1 | Validation Cohort 2 |
| Area under ROC curve,<br>concordance index | 0.739 (0.660-0.829) | 0.717 (0.639-0.795) | 0.709(0.606-0.786)  |
| Cutoff score                               | 168                 | 168                 | 168                 |
| Period prevalence rate, %                  | 8.9                 | 11.6                | 9.7                 |
| Sensitivity, Se, %                         | 65.5(45.7-82.1)     | 66.5(51.2-82.3)     | 66.7(59.4-99.2)     |
| Specificity, Sp, %                         | 82.2(77.3-86.3)     | 88.1(84.2-91.4)     | 82.1(63.1-93.9)     |
| Positive predictive value, PPV, %          | 26.4(16.7-38.1)     | 33.9(22.1-47.4)     | 28.6(23.7-71.0)     |
| Negative predictive value, NPV, %          | 96.1(92.9-98.1)     | 92.7(89.2-95.3)     | 95.8(78.9-99.9)     |
| Consistency rate, %                        | 80.7(76.0-84.8)     | 83.3(79.1-87.0)     | 80.6(62.5-92.5)     |

*Abbreviations: MVI, microvascular invasion; ROC, receiver operating characteristic. Patients who had a nomogram score of less than 168 or 168 or greater were considered to have low or high risks of MVI presence, respectively.*
